# Supplementary material for: Detecting long-term changes in point-source fossil CO 2 emissions with tree ring archives
Source: Copernicus journal article supplement (doi:10.5194/acp-16-5481-2016), 2016-05-03
Supplement: Supplementary file 1 [file acp-16-5481-2016-supplement.pdf]

Supplement of Atmos. Chem. Phys., 16, 5481–5495, 2016  
<http://www.atmos-chem-phys.net/16/5481/2016/>  
doi:10.5194/acp-16-5481-2016-supplement  
© Author(s) 2016. CC Attribution 3.0 License.

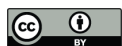

Atmospheric  
Chemistry  
and Physics  
Open Access  
EGU

*Supplement of*

## **Detecting long-term changes in point-source fossil CO<sub>2</sub> emissions with tree ring archives**

**Elizabeth D. Keller et al.**

*Correspondence to:* Elizabeth D. Keller (l.keller@gns.cri.nz)

The copyright of individual parts of the supplement might differ from the CC-BY 3.0 licence.

Table S1. Self-reported annual average emission rates of CO<sub>2</sub>ff at Vector and Ballance plants.

| Year<br>(Sept-Apr)    | Vector<br>(gC s <sup>-1</sup> ) | Ballance<br>(gC s <sup>-1</sup> ) | Total<br>(gC s <sup>-1</sup> ) |
|-----------------------|---------------------------------|-----------------------------------|--------------------------------|
| 2004                  | 5328                            | 1576                              | 6904                           |
| 2005                  | 5711                            | 1601                              | 7312                           |
| 2006                  | 5714                            | 1728                              | 7441                           |
| 2007                  | 4611                            | 1627                              | 6238                           |
| 2008                  | 4968                            | 1355                              | 6323                           |
| 2009                  | 5654                            | 1642                              | 7296                           |
| 2010                  | 5436                            | 1683                              | 7119                           |
| 2011                  | 5300                            | 884                               | 6184                           |
| Mean                  | 5340                            | 1512                              | 6852                           |
| Standard<br>Deviation | 388 (7.3%)                      | 88 (18%)                          | 525 (7.7%)                     |

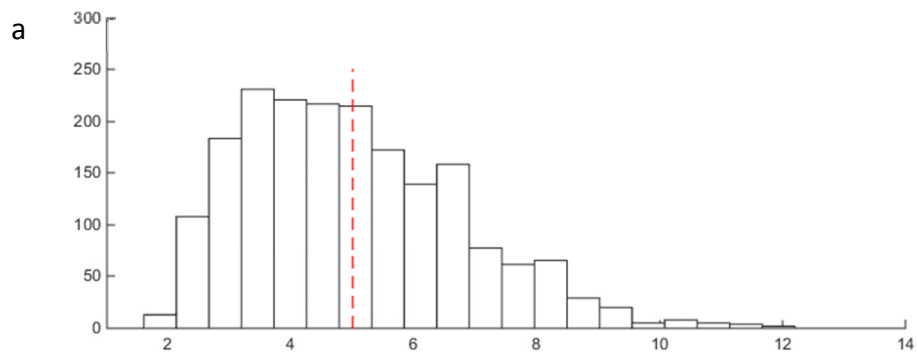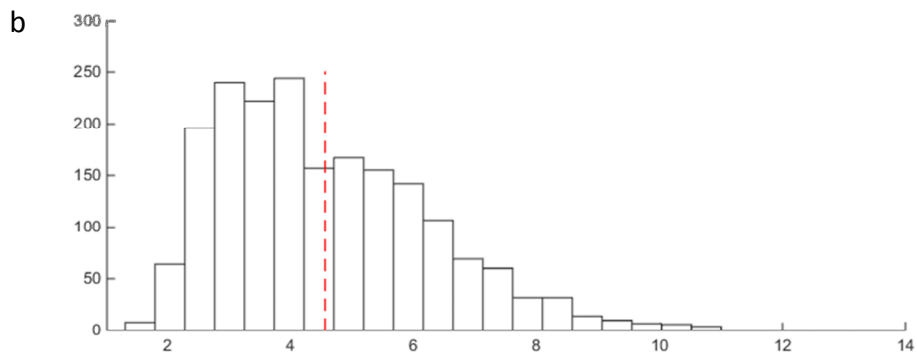

Figure S1. Histograms of daily mean wind speeds ( $\text{m s}^{-1}$ ) at Hawera (a) and Kapuni (b) for the eight growing seasons 2004-2011 from the VCSN. Dashed red line shows the mean over the entire period ( $5.0$  and  $4.6 \text{ m s}^{-1}$  for Hawera and Kapuni, respectively).

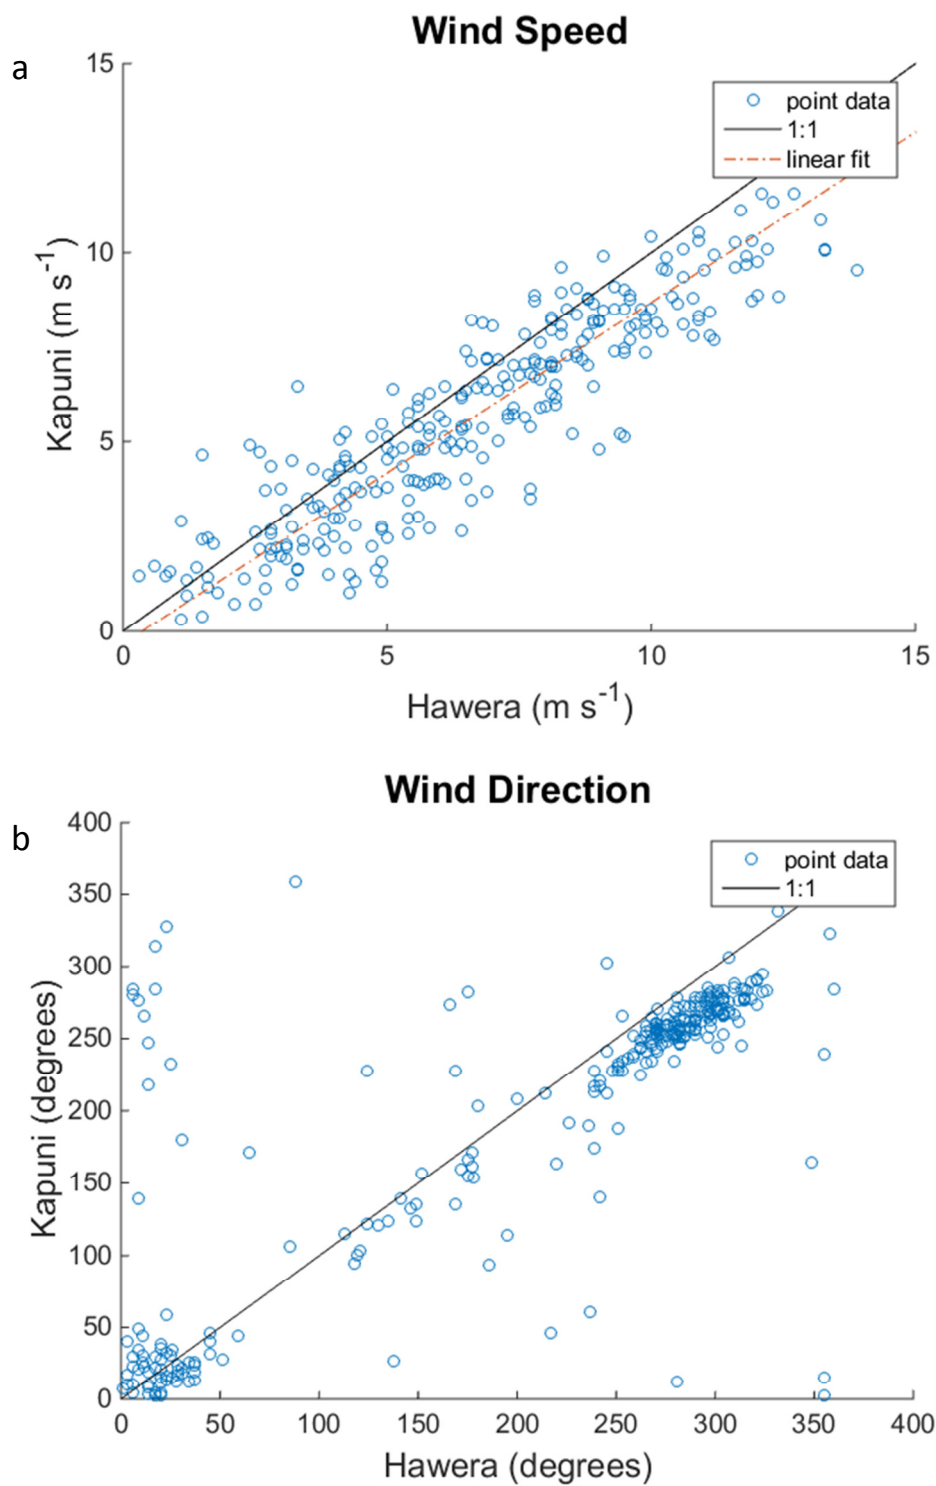

Figure S2. Wind speed in  $\text{m s}^{-1}$  (a) and wind direction in degrees (b) compared at each hourly time step at Kapuni and Hawera. Data from both sites spans daylight hours from 14 August - 26 October 2012. The 1:1 line is shown for reference. For wind speed, the linear fit of the data is also shown in red (computed with model II linear regression):  $y = 0.90*x - 0.32$ .

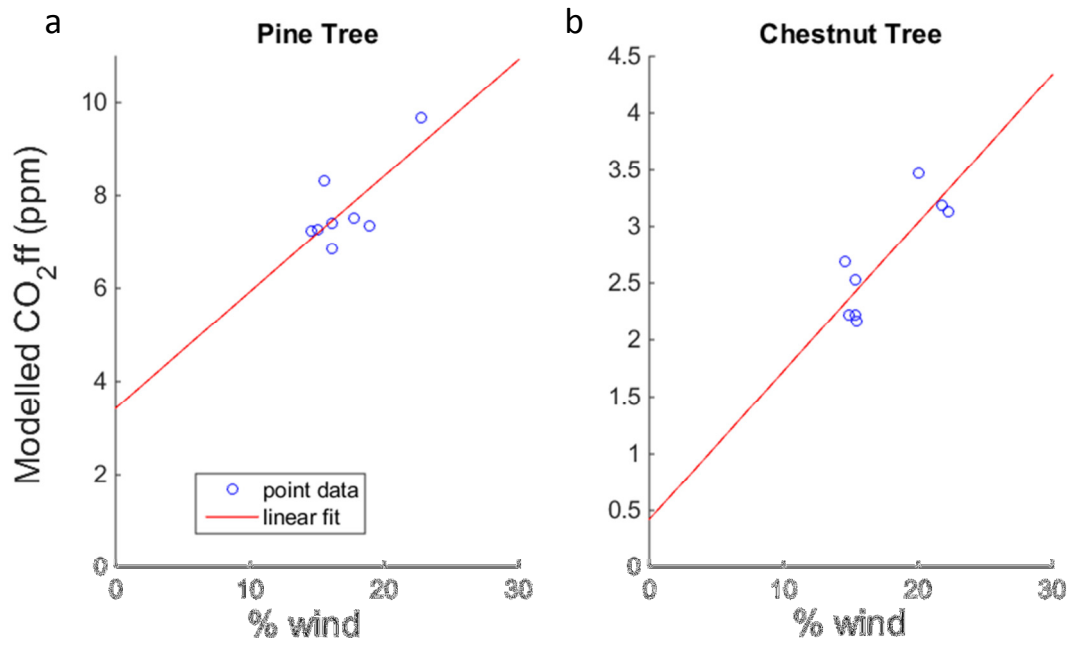

Figure S3. Correlation between % of wind from the north in each year and modelled annual CO<sub>2</sub>ff (constant emissions) at the locations of the pine (a) and chestnut (b) trees.  $R^2 = 0.56$  (pine) and  $0.72$  (chestnut). Red line is a linear regression fit of the data:  $y = 0.25*x + 3.42$  (pine) and  $y = 0.13*x + 0.42$  (chestnut).
